# Supplementary material for: WAVY GROWTH Arabidopsis E3 ubiquitin ligases affect apical PIN sorting decisions
Source: PubMed Central journal article supplement (PMC9437102; doi:10.1038/s41467-022-32888-8), 2022-09-01
Supplement: 41467_2022_32888_MOESM1_ESM.pdf [file 41467_2022_32888_MOESM1_ESM.pdf]

## Supplementary Information for:

'WAVY GROWTH Arabidopsis E3 ubiquitin ligases affect apical PIN  
sorting decisions'

*Konstantinova et al.*

## SUPPLEMENTARY TABLES

Supplementary Table 1: Segregation of cotyledon and seedling growth arrest phenotypes

| genotype                          | $\Sigma$ individuals | mono/tricots,<br>fused cotyledons | no cotyledons | seedling growth<br>arrest |
|-----------------------------------|----------------------|-----------------------------------|---------------|---------------------------|
| wild type                         | 72                   | 0                                 | 0             | 0                         |
| <i>pid-14/+</i>                   | 105                  | 21                                | 0             | 1                         |
| <i>wav triple</i>                 | 69                   | 0                                 | 0             | 0                         |
| <i>pid-14/+ wag2-1</i>            | 84                   | 14                                | 2             | 1                         |
| <i>pid-14/+ wag1-1 wag2-1</i>     | 84                   | 0                                 | 23            | 1                         |
| <i>wav triple pid-14/+</i>        | 91                   | 1                                 | 27            | 6                         |
| <i>wav triple pid-14/+ wag2-1</i> | 107                  | 0                                 | 29            | 16                        |

**Supplementary Table 2: Oligonucleotides used for genotyping and DNA cloning**

| oligo ID     | sequence                                                         | application                      |
|--------------|------------------------------------------------------------------|----------------------------------|
| wav3-1F      | 5'-ATTCTGAGATGCAGAGTGTAT-3'                                      | genotyping                       |
| wav3-1R      | 5'-GTTGCTTAATATGTTTCTTACTCTG-3'                                  | genotyping                       |
| wavh1-1F     | 5'-ACAACAACACACGAGTCACG-3'                                       | genotyping                       |
| wavh1-1R     | 5'-CGGGAGATATCGGAGATGAA-3'                                       | genotyping                       |
| wavh2-1F     | 5'-CTCACAGGAAATGGTGTG-3'                                         | genotyping                       |
| wavh2-1R     | 5'-GTCGTTGTACACTCTCAGTG-3'                                       | genotyping                       |
| pid-14F      | 5'-CTTGCAATCGTTATGGAATATT-3'                                     | genotyping                       |
| pid-14R      | 5'-CCGTCGGATCTAACTAAGATA-3'                                      | genotyping                       |
| wag1-1F      | 5'-ATGGAAGACGACGGTATTACC-3'                                      | genotyping                       |
| wag1-1R      | 5'-GGAGAAACAACCCACCACG-3'                                        | genotyping                       |
| wag1-1F      | 5'-AACGACAGACTCTCAACCGCAA-3'                                     | genotyping                       |
| wag2-1F      | 5'-GACACCGATCTTGATCTCAGCT-3'                                     | genotyping                       |
| wag2-1R      | 5'-GGAATGTAAGTCTCCATTGGG-3'                                      | genotyping                       |
| eir1-4F      | 5'-GGAAGCCAACCGAAGAAT-3'                                         | genotyping                       |
| eir1-4R      | 5'-GTGACATTATTATAGTACTTACTTGA-3'                                 | genotyping                       |
| LB           | 5'-TGTTTCACGTAGTGGGCCATCG-3'                                     | genotyping                       |
| WAVH1Xmaf    | 5'-GGCCCGGGATGTTAAACGGCTGGAGAAGAG-3'                             | WAVH1 cds cloning                |
| WAVH1Xmar    | 5'-GCCCCCGGGTAAATCTAGCGTTTTCGAAACCATG-3'                         | WAVH1 cds cloning                |
| WAVH1pf      | 5'-GCCGAATCAAGTAAAATTGGCTCACAT-3'                                | WAVH1 promoter cloning           |
| WAVH1pr      | 5'-GCCGAATCTTCTTCTTCTTCAACCTCGTG-3'                              | WAVH1 promoter cloning           |
| WAV3AGT-f    | 5'-GGGGTACCAATGGGTACTGGTGGCGACG-3'                               | WAV3 promoter fragment cloning   |
| WAV3-Kpn-r   | 5'-CGGGTACCTTAAAATCTAGCGTTTCG-3'                                 | WAV3 promoter fragment cloning   |
| W3SacIIr     | 5'-TGCTTGTGAGATCCGGCGCGCGGCAT-3'                                 | WAV3 promoter fragment cloning   |
| W3pSacI/NotI | 5'-GTTGAGCTCGGCTGTTGAATCTCTATTGGCG-3'                            | WAV3 promoter fragment cloning   |
| WAVSpe-f     | 5'-TGGCGACGAGCCTTTTGCACCACCGCCACTAGTAAACAGCGATGCCCGG-3'          | WAV3 cds cloning                 |
| WAVSpe-r     | 5'-CCGCGCATCGCTGTTACTAGTGGCGGTGGTGCAAAAGCTCGTCGCCA-3'            | WAV3 cds cloning                 |
| attB1WAV3-f  | 5'-GGGGACAAGTTTGTACAAAAAAGCAGGCTTTATGGGTACTGGTTGGCGACGAG-3'      | WAV3 cDNA Gateway cloning        |
| attB2WAV3-r  | 5'-GGGGACCACTTTGTACAAGAAAGCTGGGTTTTAAAATCTAGCGTTTTTCGAAGC-3'     | WAV3 cDNA Gateway cloning        |
| VenSpe-f     | 5'-GGACTAGTGTGAGCAAGGGCGAGGAGCTG-3'                              | Venus for N-terminal WAV3 fusion |
| VenSpe-r     | 5'-GGACTAGTGTACAGCTCGTCCATG-3'                                   | Venus for N-terminal WAV3 fusion |
| WAVH2f2      | 5'-GGCGGGCATGCACGCACGAAGTCATG-3'                                 | genomic WAVH2 fragment cloning   |
| WAVH2r1      | 5'-GGCCCGGGTAAATCTGGCGTTTTCCAAGCCGTG-3'                          | genomic WAVH2 fragment cloning   |
| SOR1GWf2     | 5'-GGGGACAAGTTTGTACAAAAAAGCAGGCTTTATGGGGACGGGTGGCGGAGGGCA-3'     | cloning of SOR1-GFP fusion       |
| SOR1GWR2     | 5'-GGGGACCACTTTGTACAAGAAAGCTGGGTTTCAGAATCTGGCGTTCTCGAAACCGTGG-3' | cloning of SOR1-GFP fusion       |
| OPL2F        | 5'-GGGGACAAGTTTGTACAAAAAAGCAGGCTTGATGCTTATGAATAATCCTGC-3'        | cloning of OPL2-YFP fusion       |
| OPL2R        | 5'-GGGGACCACTTTGTACAAGAAAGCTGGGTTGTAAGTTTCATAACATTTTC-3'         | cloning of OPL2-YFP fusion       |
| PIDqf-1      | 5'-TCCTTCTCTCAAACCTCACC-3'                                       | PID qPCR                         |
| PIDqr-1      | 5'-CGTTTTCTCCATCTCTGCTC-3'                                       | PID qPCR                         |
| PIDqf-2      | 5'-CTTCTTCTCTCAAACCTCAC-3'                                       | PID qPCR                         |
| PIDqr-2      | 5'-CTTTATCCACAATTTTCATCGC-3'                                     | PID qPCR                         |
| Actin2/8-F   | 5'-ACGGTAACATTTGCTCAGTGGTG-3'                                    | qPCR                             |
| Actin2/8-R   | 5'-CTTGGAGATCCACATCTGTGGA-3'                                     | qPCR                             |
| EF1a-f       | 5'-TGAGCACGCTTCTTGTCTTCA-3'                                      | qPCR                             |
| EF1a-r       | 5'-GGTGGTGGCATCCATCTTGTACA-3'                                    | qPCR                             |
| pP2-ageF     | 5'-GCGCACCGGTATCTTCAATAGTTTCATCC-3'                              | OPL2 cloning                     |
| pP2-xhoR     | 5'-CGCGCTCGAGTTTGATTACTTTTCCGG-3'                                | OPL2 cloning                     |
| OPL2_B1-F    | 5'-GGGGACAAGTTTGTACAAAAAAGCAGGCTTGATGGTTATGAATAATCCTGC-3'        | OPL2 cloning                     |
| OPL2_B2-R    | 5'-GGGGACCACTTTGTACAAGAAAGCTGGGTTGTAAGTTTCATAACATTTTC-3'         | OPL2 cloning                     |

## SUPPLEMENTARY FIGURES

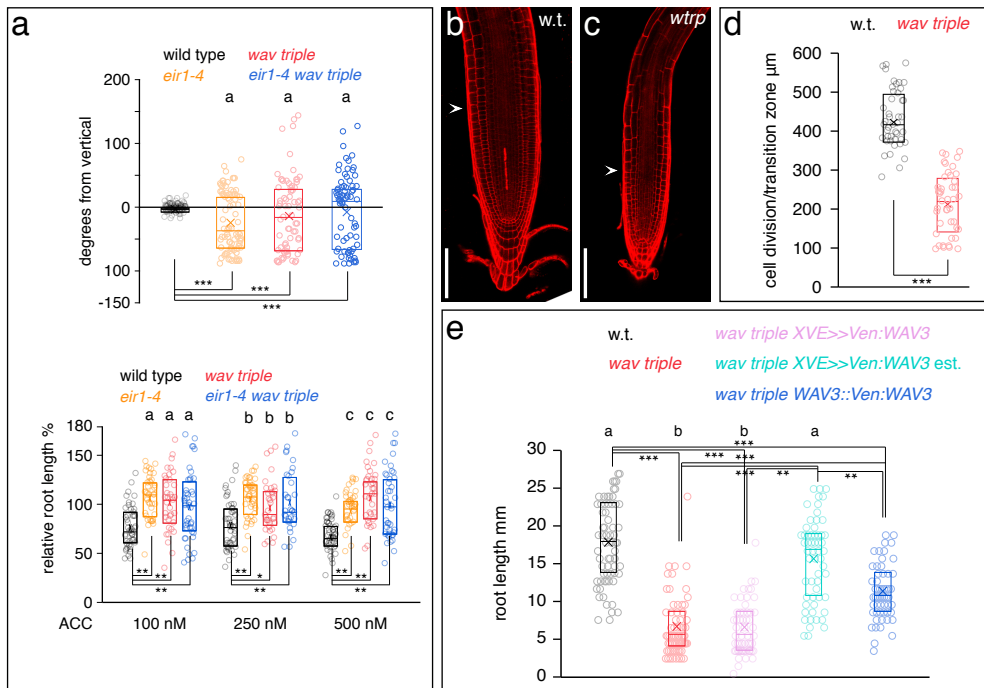

**Supplementary Figure 1.** Characterization of *wav triple*. **a**) Orientation of root tips, expressed as degrees deviation from vertical of 5 DAG wild type (n = 87), *eir1-4* (n = 86), *wav triple* (n = 71) and *eir1-4 wav triple* (n = 73) seedlings (top; from 3 experiments). Primary root elongation of 7 DAG wild type (100 nM ACC, n = 49; 250 nM ACC, n = 49; 500 nM ACC, n = 48), *eir1-4* (100 nM ACC, n = 42; 250 nM ACC, n = 43; 500 nM ACC, n = 39), *wav triple* (100 nM ACC, n = 36; 250 nM ACC, n = 34; 500 nM ACC, n = 35) and *eir1-4 wav triple* (100 nM ACC, n = 45; 250 nM ACC, n = 32; 500 nM ACC, n = 37) seedlings in presence of ACC (bottom; root length on control = 100%). **b,c**) Propidium iodide staining of wild type (w.t.) and *wav triple* (*wtrp*) primary root meristem at 5 DAG. Arrowheads indicate onset of cell elongation. Comparable results were obtained in 5 experimental repeats **d**) Comparison of root meristem cell division/transition zone size (defined as the area with essentially isodiametric shape of epidermis cells) of wild type (w.t.; n = 44) and *wav triple* (*wtrp*; n = 43) seedlings at 5 DAG. **e**) Primary root length of 5 DAG wild type (w.t.; n = 67), *wav triple* (n = 69), *wav triple XVE>>Ven:WAV3* on control medium (n = 55) and in presence of 2 μM estradiol ('est.'; n = 58), and of *wav triple WAV3::Ven:WAV3* seedlings (n = 56). Circles represent single data points; boxes: first and third quartiles; center line: median; 'x': mean value. Two-tailed t-test was performed to determine the significance of differences between data sets (d). One-way ANOVA tests were employed to determine the difference between the averages (e); Levene's tests were employed to determine the equality of variances (a); \*\*: p < 0.01; \*\*\*: p < 0.001; a,b,c: p > 0.05. Size bars: b,c = 50 μm. Source data are provided as Source Data file.

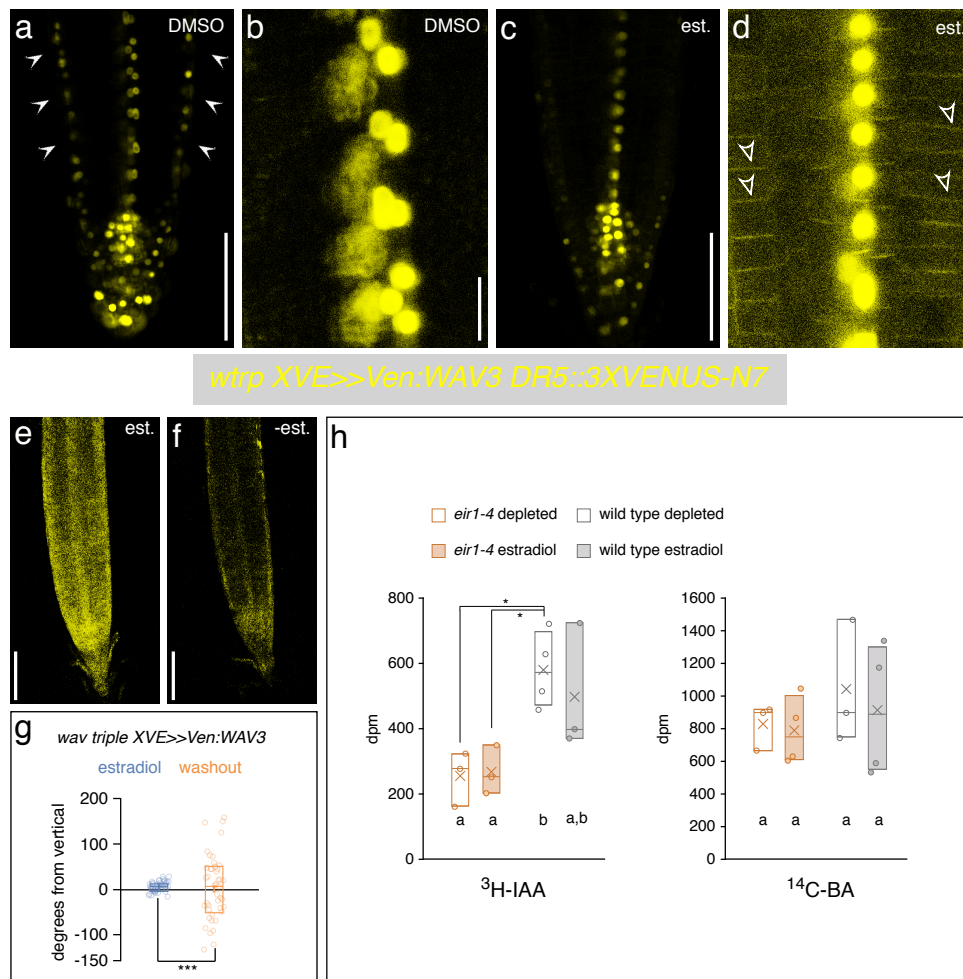

**Supplementary Figure 2.** Auxin distribution in *wav triple*. **a-d**) Expression of *DR5rev:3XVENUS-N7* in *wav triple XVE::Venus:WAV3* root meristems at 5 DAG. On DMSO control plates laterally located nuclear DR5-Venus signals are indicated by arrowheads (a), whereas no *XVE::Venus:WAV3* expression is visible (b). Upon incubation on 2  $\mu$ M estradiol ('est.:'; c,d) Venus:WAV3 expression is clearly visible (d, open arrowheads). Similar results were observed in 3 experimental repeats on DMSO and on estradiol. **e,f**) Reporter gene expression in *wav triple XVE>>Ven:WAV3* root meristems grown on 2  $\mu$ M estradiol ('est.:' for 5 days, followed by washout in liquid growth medium and transfer onto fresh estradiol plate (e) or on a control plate containing solvent only ('-est.:'; f). Images were taken after 6 hours incubation. A reproducible downregulation of Venus reporter signals was detected in 5 experimental repeats. **g**) Reorientation of root growth of *wav triple XVE>>Ven:WAV3* grown on 2  $\mu$ M estradiol for 5 days followed by washout and incubation on control medium (n = 43) or in presence of 2  $\mu$ M estradiol (n = 47) and gravistimulated for 12 hours. Direction of root tips is expressed as degrees deviation from vertical. **h**) Root shootward (basipetal) PAT measurement using  $^3\text{H}$ -IAA and as a control,  $^{14}\text{C}$ -benzoic acid (BA), on 5 DAG wild type (BA: estradiol depleted, n = 3; estradiol, n = 4. IAA: estradiol depleted, n = 3; estradiol, n = 4. Each data point represents results from 20 pooled roots) and *eir1-4* seedlings (BA: estradiol depleted, n

= 3; estradiol, n = 4. IAA: estradiol depleted, n = 3; estradiol, n = 3. Each data point represents results from 20 pooled roots). Radiotracers were applied to the root tip followed by their quantification 5 mm above the very root tip. Assays were conducted in presence of 2  $\mu$ M 17 $\beta$ -estradiol ('estradiol') or in presence of DMSO solvent only ('depleted'); for further details see Methods. Circles represent single data points; boxes: first and third quartiles; center line: median; 'x': mean value. Levene's tests were employed to determine the equality of variances (g). One-way ANOVA tests were employed to determine the difference between the averages (h); \*: p < 0.05; \*\*\*: p < 0.001; a,b: p > 0.05. Size bars: a,c,e,f = 50  $\mu$ m; b,d = 20  $\mu$ m. Source data are provided as Source Data file.

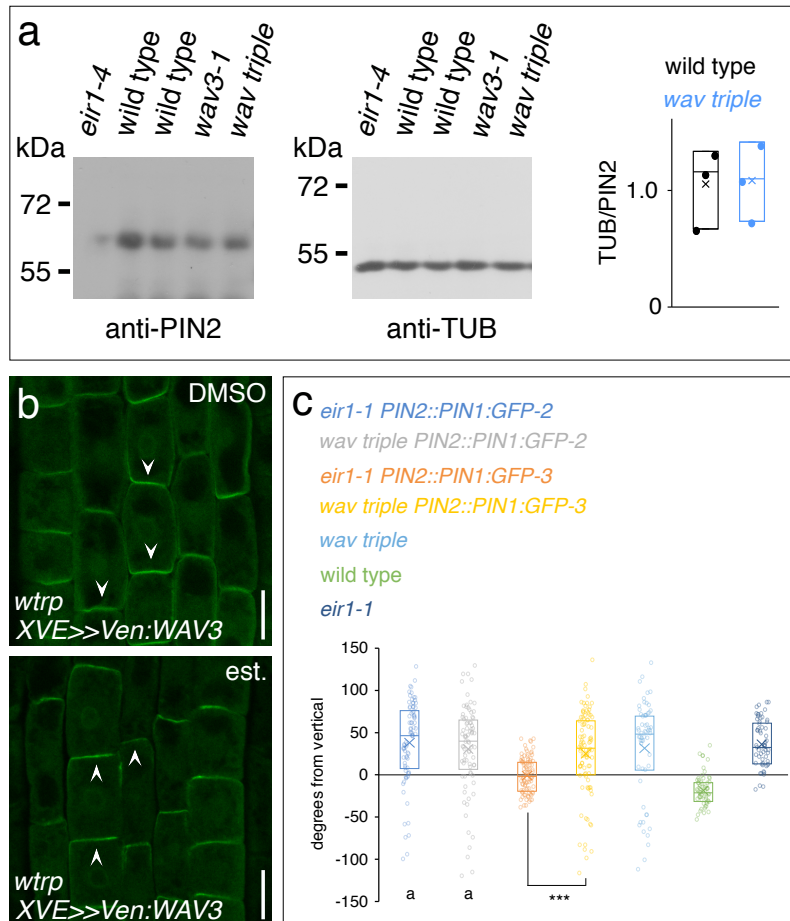

**Supplementary Figure 3. PIN2 in *wav triple* and root gravitropism in *wav triple***

*PIN2::PIN1:GFP* reporter lines. **a**) Western blots performed with 5 DAG *eir1-4*, wild type (w.t.), *wav3-1* and *wav triple* membrane protein extracts, probed with anti-PIN2. Anti- $\alpha$ -tubulin (TUB) was used as loading control (left panels). TUB-to-PIN2 signal ratio in 7 DAG wild type and *wav triple* root membrane protein extracts. Dots represent data from 3 biological repeats; boxes: first and third quartiles; center line: median; 'x': mean value. Two-tailed t-test was performed to test for significant differences (right panel) **b**) PIN2 immunostaining (green signals) in root meristem epidermis cells of 5 DAG *wav triple* *XVE>>Ven:WAV3* germinated in presence of 2  $\mu$ M estradiol ('est.'; right) or solvent only ('DMSO'; left). Arrowheads indicate polarity of PIN2 signals. Similar PIN2 polarity switches were observed in 5 experimental repeats. **c**) Orientation of root growth of 5 DAG *eir1-1 PIN2::PIN1:GFP-2* (n = 80), *wav triple PIN2::PIN1:GFP-2* (n = 78), *eir1-1 PIN2::PIN1:GFP-3* (n = 87), *wav triple PIN2::PIN1:GFP-3* (n = 92), *wav triple* (n = 59), wild type (n = 59) and *eir1-1* (n = 59). Direction of root tips is expressed as degrees deviation from vertical. Circles represent single data points; boxes: first and third quartiles; center line: median; 'x': mean value. Levene's tests were employed to determine the equality of variances of *PIN2::PIN1:GFP-2* and *PIN2::PIN1:GFP-3* data sets, respectively; \*\*\*: p < 0.001; a: p > 0.05. Source data are provided as Source Data file.

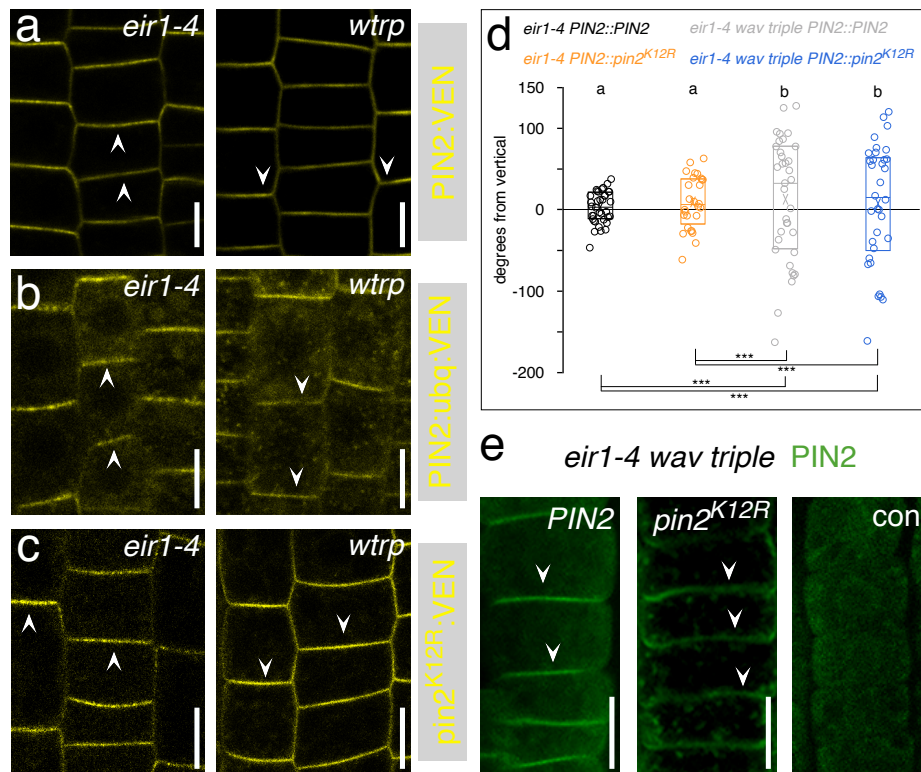

**Supplementary Figure 4.** Analysis of *wav triple* lines expressing *pin2* alleles with compromised ubiquitylation status. **a-c**) Root meristem cells of 5 DAG *eir1-4* and *wav triple* (*wtrp*) expressing *PIN2::PIN2::VEN* (a), *PIN2::PIN2::ubq::VEN* (b) and *PIN2::pin2<sup>K12R</sup>::VEN* (c). **d**) Orientation of root growth of 5 DAG *eir1-4* *PIN2::PIN2* (n = 36), *eir1-4 wav triple* *PIN2::PIN2* (n = 35), *eir1-4* *PIN2::pin2<sup>K12R</sup>* (n = 28) and *eir1-4 wav triple* *PIN2::pin2<sup>K12R</sup>* (n = 34). Direction of root tips is expressed as degrees deviation from vertical. Similar results were obtained in 3 independent experiments. **e**) PIN2 immunolocalization in *eir1-4 wav triple* root meristem epidermis cells expressing *PIN2::PIN2* (left), *PIN2::pin2<sup>K12R</sup>* (middle) and control ('con.') lacking a reporter construct, at 5 DAG. Comparable results were obtained in 3 immunostaining experiments. Arrowheads indicate polarity of reporter protein signals at the PM. Circles represent single data points; boxes: first and third quartiles; center line: median; 'x': mean value. Levene's tests were employed to determine the equality of variances; \*\*\*: p < 0.001; a,b: p > 0.05. Size bars: a-c,e = 10  $\mu$ m. Source data are provided as Source Data file.



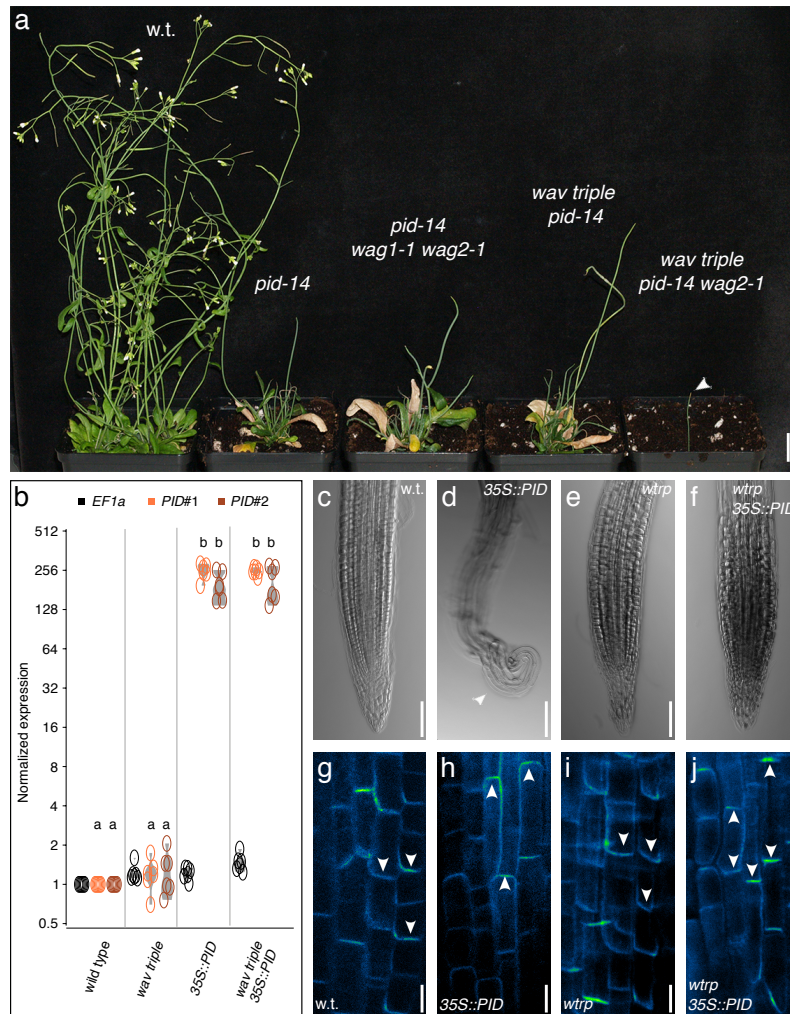

**Supplementary Figure 5.** Crosstalk between *WAV3/WAVH* and *PID/WAG* genes. **a**) From left-to-right: Flowering wild type (w.t.; 28 DAG), *pid-14*, *pid-14 wag1-1 wag2-1*, *wav triple pid-14*, *wav triple pid-14 wag2-1* (all 38 DAG). Arrowhead indicates pin-like inflorescence of *wav triple pid-14 wag2-1* plantlet. **b**) *PID* transcript levels in wild type, *wav triple*, *35S::PID* and *wav triple 35S::PID* seedlings at 7 DAG. Six repetitions with two different *PID* primer pairs (*PID#1* and *PID#2*) and an *EF1a* (*At1g07940*) primer pair were made for each sample. Transcript levels were normalized to expression of *ACT2* (*At3g18780*). Wild type transcript levels were set to one; circles represent individual repetitions. One-way ANOVA tests were employed to determine the difference between the averages; a,b:  $p > 0.05$ . **c-f**) 5 DAG primary root meristems of wild type (w.t.; c), *35S::PID* (d), *wav triple* (*wtrp*; e) and *wav triple 35S::PID* (*wtrp 35S::PID*; f). Arrowhead indicates root meristem consumption in *35S::PID*. Comparable results were observed in 3 experimental repeats, with a total of 12 root meristems analyzed for each line. **g-j**) PIN1 immunolocalization in root meristem stele cells of 4 DAG wild type (w.t.; g), *35S::PID* (h), *wav triple* (*wtrp*; i) and *wav triple 35S::PID* (*wtrp 35S::PID*; j). Arrowheads indicate polarity of PIN1 localization. Comparable results were observed in 3 separate immunostaining experiments performed with all 4 lines. Size bars: a = 10 mm; c-f = 20  $\mu$ m; g-j = 5  $\mu$ m. Source data are provided as Source Data file.

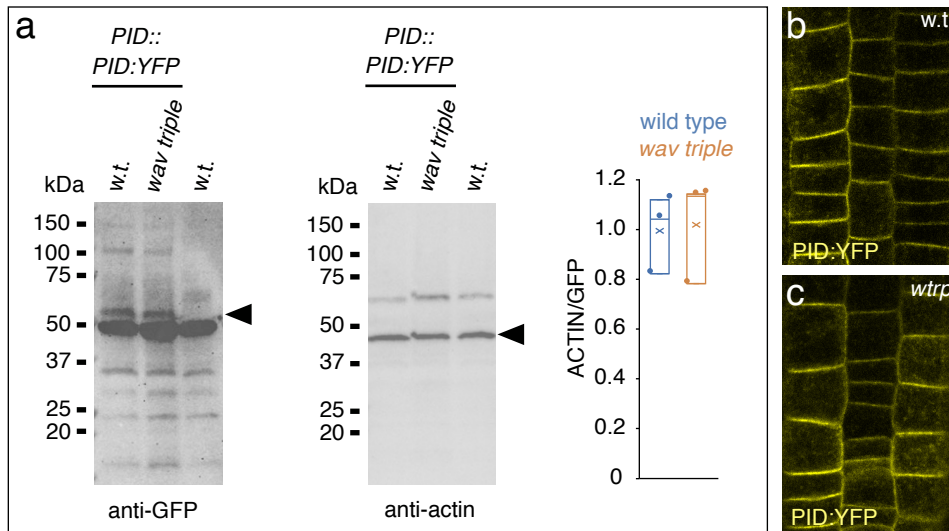

**Supplementary Figure 6.** *PID* expression in *wav triple*. **a)** Western blots performed with protein extracts obtained from 7 DAG wild type (w.t.), *wav triple PID::PID:YFP* and wild type *PID::PID:YFP*, probed with anti-GFP (left panel). Anti-actin (actin) was used as loading control (middle panel). Arrowheads indicate *PID:YFP* and actin, respectively. ACTIN-to-GFP signal ratio in 7 DAG wild type and *wav triple* root membrane protein extracts (right panel). Dots represent data from 3 biological repeats; boxes: first and third quartiles; center line: median; 'x': mean value. Two-tailed t-test was done to test for significant differences ( $p > 0.05$ ). **b,c)** Subcellular localization of *PID:YFP* (yellow) in 7 DAG wild type *PID::PID:YFP* (w.t.; b) and *wav triple PID::PID:YFP* (*wtrp*; c) root meristem epidermis cells. 12 root meristems examined in 3 experiments produced similar results. Size bars: b,c = 10  $\mu$ m. Source data are provided as Source Data file.

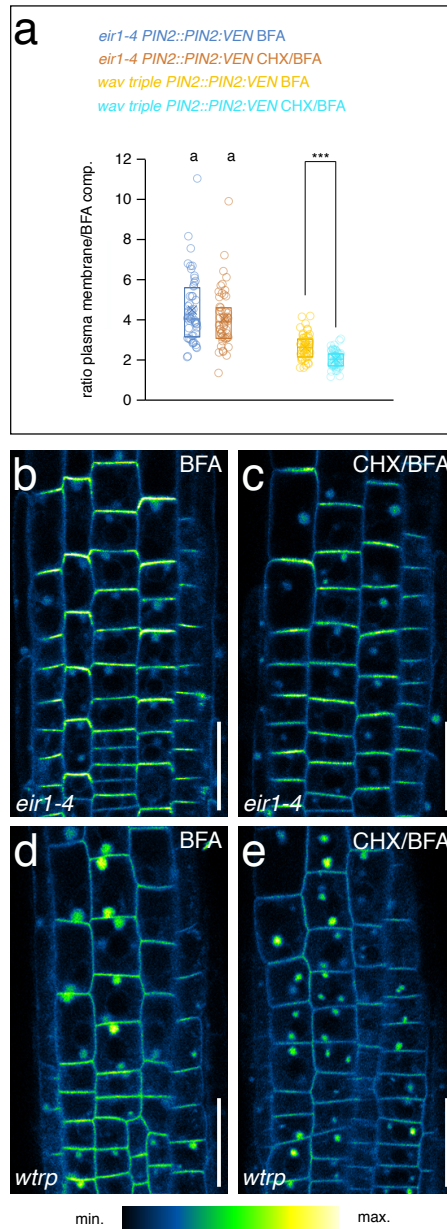

**Supplementary Figure 7.** Analysis of PIN2-Venus subcellular distribution upon inhibition of BFA-sensitive ARF-GEFs. **a)** Plasma membrane-to-BFA compartment signal ratio in 4 DAG *eir1-4 PIN2::PIN2:VEN* and *wav triple PIN2::PIN2:VEN* root meristem epidermis cells treated with BFA only (BFA), or pretreated with CHX followed by CHX/BFA co-treatment (CHX/BFA). For further experimental details see Methods. **b-e)** 4 DAG *eir1-4 PIN2::PIN2:VEN* (*eir1-4*; b,c) and *wav triple PIN2::PIN2:VEN* (*wtrp*; d,e) root meristem epidermis cells treated with BFA only (b,d) or pretreated with CHX followed by CHX/BFA co-treatment (c,e). Circles represent single data points; boxes: first and third quartiles; center line: median; 'x': mean value. Two-tailed t-tests were employed to test for significance; n = 51 for each line; \*\*\*: p < 0.001; a: p > 0.05. Size bars: b-e = 20  $\mu$ m. Source data are provided as Source Data file.

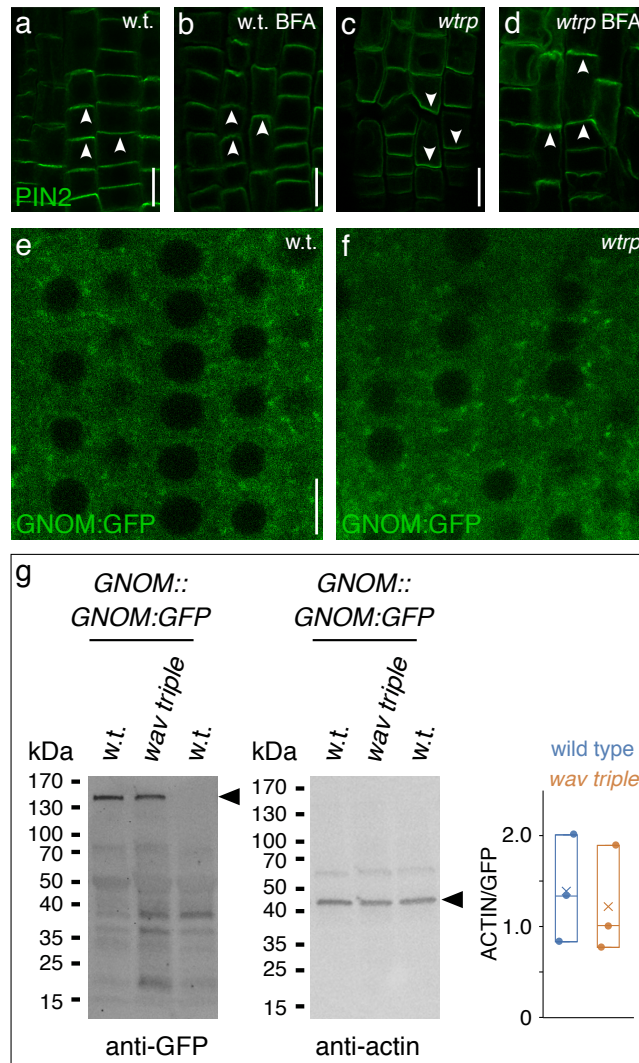

**Supplementary Figure 8.** Analysis of crosstalk between *wav triple* and *GNOM* **a-d**) PIN2 immuno-localization in 5 DAG wild type (w.t.; a,b) and *wav triple* (*wtrp*; c,d) root meristem epidermis cells. Seedlings were subject to treatment with 10  $\mu$ M BFA for 24 hours (b,d) or incubated on control medium containing solvent only (a,c). Arrowheads indicate polarity of PIN2 signals. BFA-induced PIN2 polarity shifts were observed in 3 experimental repetitions **e,f**) Wild type (w.t.; e) and *wav triple* (*wtrp*; f) root meristem epidermis cells of 5 DAG seedlings, expressing *GNOM::GNOM:GFP*. A comparable distribution of GNOM-GFP reporter signals was observed in 3 independent experiments, with a total of 9 individuals analyzed for both genotypes. **g**) Western blots performed with protein extracts obtained from 7 DAG wild type (w.t.), *wav triple GNOM::GNOM:GFP* and wild type *GNOM::GNOM:GFP*, probed with anti-GFP (left panel). Anti-actin was used as loading control (middle panel). Arrowheads indicate GNOM:GFP and actin, respectively. ACTIN-to-GFP signal ratio in 7 DAG wild type and *wav triple* root membrane protein extracts (right panel). Dots represent data from 3 biological repeats; boxes: first and third quartiles; center line: median; 'x': mean value. Two-tailed t-test was performed to test for significance ( $n = 3$ ;  $p > 0.05$ ). Size bars: a-d = 20  $\mu$ m; e,f = 10  $\mu$ m. Source data are provided as Source Data file.

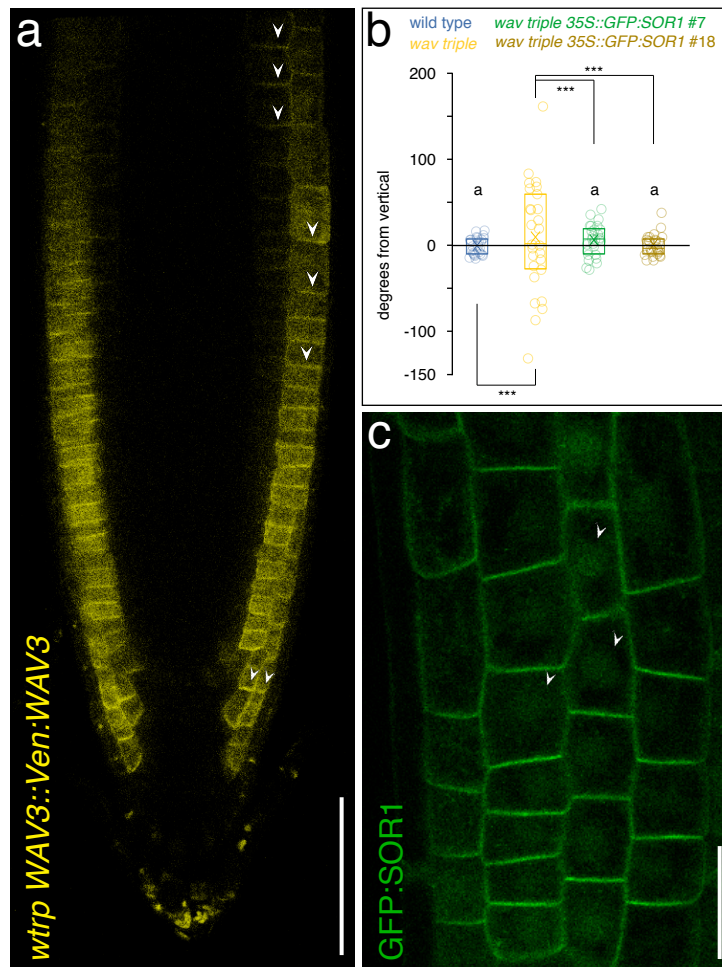

**Supplementary Figure 9.** Expression of *WAV3* and *SOR1* reporter genes. **a)** Subcellular Venus signal localization in a 6 DAG *wav triple* (*wtrp*) primary root meristem expressing partially complementing *WAV3::Ven:WAV3*. Arrowheads indicate basal localization in root meristem LRC, epidermis and cortex cells. A similar reporter signal distribution was observed in 3 independent experimental repeats. **b)** Orientation of root growth of 7 DAG wild type ( $n = 26$ ), *wav triple* ( $n = 27$ ) and two *wav triple* lines ( $n = 27$  for each line) expressing *35S::GFP:SOR1* (#7, #18). **c)** Root meristem epidermis cells of 5 DAG *wav triple 35S::GFP:SOR1* #18. Arrowheads indicate intracellular signals of reporter protein. A reproducible GFP-SOR1 signal distribution was observed in 3 experimental repeats. Circles represent single data points; boxes: first and third quartiles; center line: median; 'x': mean value. Levene's tests were employed to determine the equality of variances; \*\*\*:  $p < 0.001$ ; a:  $p > 0.05$ . Size bars: a = 50  $\mu\text{m}$ ; c = 20  $\mu\text{m}$ . Source data are provided as Source Data file.

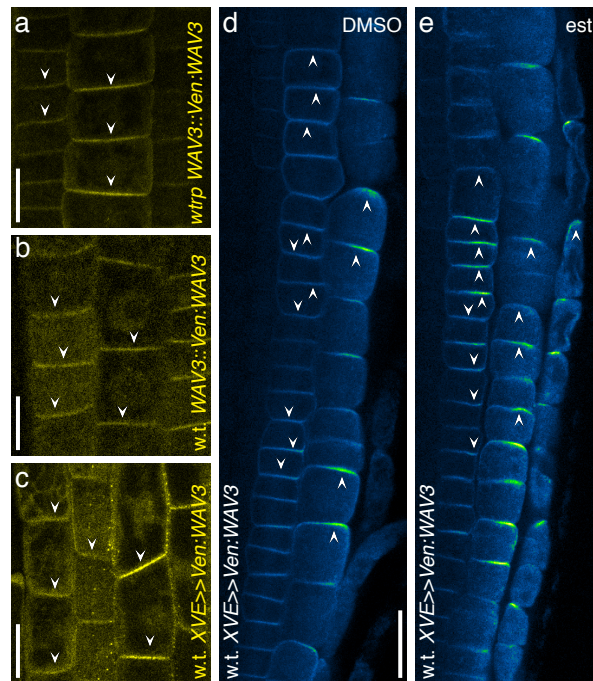

**Supplementary Figure 10.** Analysis of *WAV3::Venus* expression. **a,b**) Subcellular Venus signal distribution in root meristem epidermis cells of 6 DAG *wav triple* (*wtrp*; **a**) and wild type (w.t.; **b**) expressing *WAV3::Ven:WAV3*. Similar results were obtained in 3 experimental repeats, in which we compared *wav triple* and wild type expressing *WAV3::Ven:WAV3*. **c**) Subcellular Venus signal distribution in in root meristem epidermis cells of 6 DAG wild type (w.t.) expressing *XVE>>Ven:WAV3*, grown in presence of 2  $\mu$ M estradiol. Comparable Venus signal distribution was observed in 3 independent experiments. **d,e**) PIN2 immunostaining in wild type (w.t.) root meristem cells expressing *XVE>>Ven:WAV3* grown on medium substituted with solvent (DMSO; **d**) or in presence of 2  $\mu$ M estradiol (est.; **e**). PIN2 localization was analyzed in 3 experiments, yielding comparable results. Wild type lines expressing *WAV3* reporters were obtained in the progeny of *wav triple WAV3::Ven:WAV3* or *wav triple XVE>>Ven:WAV3* crossed into Col-0. Arrowheads indicate polarity of *WAV3-Venus* signals (**a-c**) and PIN2 signals (**d,e**). Size bars: **a-c** = 10  $\mu$ m; **d,e** = 20  $\mu$ m.

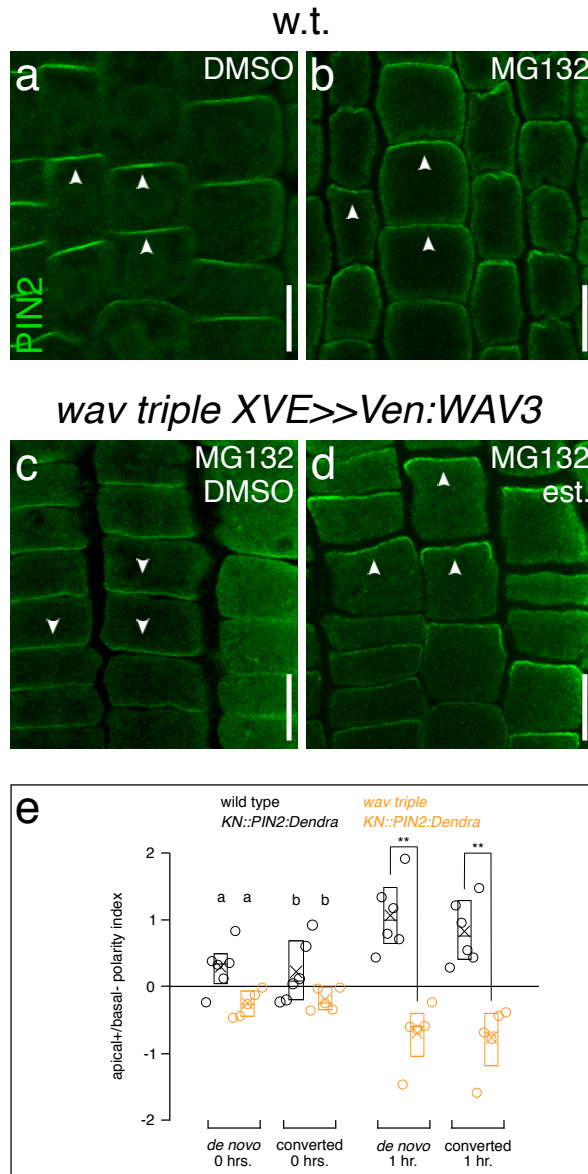

**Supplementary Figure 11.** Proteasome activity does not affect PIN2 polarity. **a,b**) PIN2 immunolocalization in 5 DAG root meristem epidermis cells of wild type (w.t.) incubated for 6 hours in presence of 50  $\mu$ M MG132 (**b**) or solvent only (DMSO; **a**). Comparable results were obtained in 3 immunostaining experiments. **c,d**) PIN2 immunolocalization in 5 DAG root meristem epidermis cells of *wav triple XVE>>Ven:WAV3*. Seedlings germinated on 5  $\mu$ M estradiol (est.; **d**) or solvent only (DMSO; **c**) were incubated in presence of 50  $\mu$ M MG132 for 6 hours and then subject to immunostaining. Arrowheads indicate polarity of PIN2 signals at the PM. Comparable results were obtained in 3 immunostaining experiments. **e**) Quantification of PIN2:Dendra polarity establishment in 5 DAG *KN::PIN2:Dendra* ( $n = 6$ ) and *wav triple KN::PIN2:Dendra* ( $n = 5$ ) upon photoconversion (0 hours) and 1 hour after such conversion. Circles represent single data points; boxes: first and third quartiles; center line: median; 'x': mean value. One-way ANOVA with post-hoc Tukey HSD was performed (**e**); \*\*:  $p < 0.01$ ; a,b:  $p > 0.05$ . Size bars: a-d = 10  $\mu$ m. Source data are provided as Source Data file.
